# Supplementary material
Source: PubMed Central journal article supplement (PMC4291087)
Supplement: Supp_Table1.pdf [file Supp_Table1.pdf]

## Supplementary Data

SUPPLEMENTARY TABLE S1. BIRTHRATES BY TUMOR SIZE AND RADIOACTIVE IODINE TREATMENT

| <i>Tumor size</i> | <i>No RAI</i>                                |                                                 | <i>Yes RAI</i>                               |                                                 | <i>Unadjusted<br/>p value</i> | <i>Adjusted<br/>p value<sup>a</sup></i> |
|-------------------|----------------------------------------------|-------------------------------------------------|----------------------------------------------|-------------------------------------------------|-------------------------------|-----------------------------------------|
|                   | <i>Women with<br/>WDTC<br/>(live births)</i> | <i>Live births<br/>per 1000<br/>woman-years</i> | <i>Women with<br/>WDTC<br/>(live births)</i> | <i>Live births<br/>per 1000<br/>woman-years</i> |                               |                                         |
| < 1 cm            | 3552 (137)                                   | 8.9                                             | 1580 (69)                                    | 10.4                                            | 0.21                          | 0.44                                    |
| 1–2 cm            | 2078 (118)                                   | 13.6                                            | 3261 (210)                                   | 14.6                                            | 0.51                          | 0.25                                    |
| 2–3 cm            | 1270 (109)                                   | 19.1                                            | 2286 (194)                                   | 18.5                                            | 0.54                          | 0.83                                    |
| 3–4 cm            | 685 (53)                                     | 17.6                                            | 1205 (97)                                    | 17.4                                            | 0.93                          | 0.54                                    |
| 4+ cm             | 790 (37)                                     | 10.7                                            | 1159 (87)                                    | 16.5                                            | 0.50                          | 0.83                                    |

<sup>a</sup>Negative binomial regression, adjusted for age, tumor stage, socioeconomic status (SES), and marital status.  
RAI, radioactive iodine; WDTC, well-differentiated thyroid cancer.
