# Supplementary material
Source: PubMed Central journal article supplement (PMC4291087)
Supplement: Supp_Table2.pdf [file Supp_Table2.pdf]

SUPPLEMENTARY TABLE S2. BIRTHRATES BY TUMOR STAGE AND RADIOACTIVE IODINE TREATMENT

| <i>Tumor stage</i> | <i>No RAI</i>                                |                                                 | <i>Yes RAI</i>                               |                                                 | <i>Unadjusted<br/>p value</i> | <i>Adjusted<br/>p value<sup>a</sup></i> |
|--------------------|----------------------------------------------|-------------------------------------------------|----------------------------------------------|-------------------------------------------------|-------------------------------|-----------------------------------------|
|                    | <i>Women with<br/>WDTC<br/>(live births)</i> | <i>Live births<br/>per 1000<br/>woman-years</i> | <i>Women with<br/>WDTC<br/>(live births)</i> | <i>Live births<br/>per 1000<br/>woman-years</i> |                               |                                         |
| Localized          | 7087 (358)                                   | 11.5                                            | 5853 (368)                                   | 14.0                                            | 0.64                          | 0.51                                    |
| Regional           | 1609 (135)                                   | 20.1                                            | 3590 (291)                                   | 18.4                                            | 0.29                          | 0.53                                    |
| Metastatic         | 271 (2)                                      | 1.6                                             | 440 (25)                                     | 11.0                                            | 0.01                          | 0.17                                    |

<sup>a</sup>Negative binomial regression, adjusted for age, tumor size, socioeconomic status (SES), and marital status  
RAI, radioactive iodine; WDTC, well-differentiated thyroid cancer.
