# Supplementary material
Source: PubMed Central journal article supplement (PMC4291087)
Supplement: Supp_Table3.pdf [file Supp_Table3.pdf]

SUPPLEMENTARY TABLE S3. MEDIAN TIME TO FIRST LIVE BIRTH BY TUMOR SIZE AND RADIOACTIVE IODINE TREATMENT

| <i>Tumor size</i> | <i>No RAI</i>                                   |                                                                   | <i>Yes RAI</i>                                  |                                                                   | <i>Unadjusted p value</i> | <i>Adjusted p value<sup>a</sup></i> |
|-------------------|-------------------------------------------------|-------------------------------------------------------------------|-------------------------------------------------|-------------------------------------------------------------------|---------------------------|-------------------------------------|
|                   | <i>Median time to first live birth (months)</i> | <i>25th and 75th percentile time to first live birth (months)</i> | <i>Median time to first live birth (months)</i> | <i>25th and 75th percentile time to first live birth (months)</i> |                           |                                     |
| < 1 cm            | 24.6                                            | (16.0, 43.8)                                                      | 29.7                                            | (20.7, 47.3)                                                      | 0.11                      | 0.04                                |
| 1–2 cm            | 26.1                                            | (16.9, 44.9)                                                      | 36.3                                            | (24.3, 52.1)                                                      | <0.01                     | <0.001                              |
| 2–3 cm            | 25.4                                            | (15.3, 44.9)                                                      | 31.8                                            | (21.4, 44.8)                                                      | 0.07                      | <0.01                               |
| 3–4 cm            | 26.2                                            | (12.5, 50.3)                                                      | 33.8                                            | (24.6, 49.3)                                                      | <0.05                     | <0.01                               |
| 4+ cm             | 21.1                                            | (13.3, 41.5)                                                      | 36.3                                            | (25.9, 54.0)                                                      | <0.01                     | 0.01                                |

<sup>a</sup>Linear regression model, adjusted for age, tumor stage, socioeconomic status (SES), and marital status. RAI, radioactive iodine.
