# Supplementary material
Source: PubMed Central journal article supplement (PMC4291087)
Supplement: Supp_Table4.pdf [file Supp_Table4.pdf]

SUPPLEMENTARY TABLE S4. MEDIAN TIME TO FIRST LIVE BIRTH  
BY TUMOR STAGE AND RADIOACTIVE IODINE TREATMENT

| <i>Tumor stage</i> | <i>No RAI</i>                                           |                                                                               | <i>Yes RAI</i>                                          |                                                                           | <i>Unadjusted<br/>p value</i> | <i>Adjusted<br/>p value<sup>a</sup></i> |
|--------------------|---------------------------------------------------------|-------------------------------------------------------------------------------|---------------------------------------------------------|---------------------------------------------------------------------------|-------------------------------|-----------------------------------------|
|                    | <i>Median time<br/>to first live<br/>birth (months)</i> | <i>25th and 75th<br/>percentile time<br/>to first live<br/>birth (months)</i> | <i>Median time<br/>to first live<br/>birth (months)</i> | <i>25th and 75th<br/>percentile time to<br/>first live birth (months)</i> |                               |                                         |
| Localized          | 25.3                                                    | (15.9, 44.4)                                                                  | 35.5                                                    | (24.1, 49.3)                                                              | <0.0001                       | <0.0001                                 |
| Regional           | 27.1                                                    | (16.8, 47.9)                                                                  | 33.4                                                    | (21.4, 46.0)                                                              | 0.02                          | <0.01                                   |
| Metastatic         | 66.6                                                    | (60.7, 72.4)                                                                  | 43.4                                                    | (29.1, 54.6)                                                              | 0.11                          | 0.56                                    |

<sup>a</sup>Linear regression model, adjusted for age, tumor size, SES, and marital status  
RAI, radioactive iodine.
